# Supplementary material
Source: Springer Nature journal article supplement (https://www.springermedizin.de/resource/supplementary/13256_2011_2073_MOESM2_ESM.pdf/9648954)

Se: 4  
Im: 163

[A]

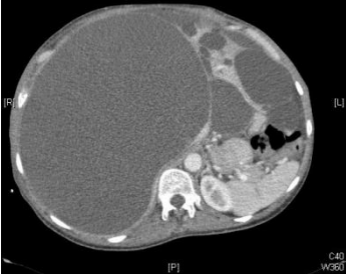

Supplement: MOESM2 [file 9648954]
